# Supplementary material for: DNA G-Quadruplex in NRP1 Promoter Facilitates SARS-CoV-2 Infection
Source: MDPI journal article supplement (doi:10.3390/ijms25084422), 2024-04-17
Supplement: s1 [file s1]

The top 30 proteins were screened out according to scores and densities in LC/MS/MS analysis

| Gene names         | Score  | Intensity mut | Intensity wt1 | Intensity wt2 |
|--------------------|--------|---------------|---------------|---------------|
| <i>YBX1</i>        | 165.6  | 0             | 11492000      | 62983000      |
| <i>A2M</i>         | 138.92 | 36784000      | 406750000     | 353820000     |
| <i>APOA1</i>       | 112.05 | 46118000      | 148780000     | 279860000     |
| <i>SERPINA1</i>    | 103.01 | 209450000     | 710530000     | 769690000     |
| <i>ITIH2</i>       | 94.572 | 0             | 287610000     | 333450000     |
| <i>HNRNPM</i>      | 85.737 | 45866000      | 142370000     | 6567500       |
| <i>IGHA1</i>       | 83.861 | 221080000     | 17006000      | 53667000      |
| <i>HNRNPA2B1</i>   | 81.919 | 265390000     | 190440000     | 51055000      |
| <i>DDX21</i>       | 71.78  | 0             | 68853000      | 3432400       |
| <i>HNRNPA1</i>     | 57.56  | 171170000     | 56472000      | 21731000      |
| <i>HEL-S-163pA</i> | 56.691 | 39847000      | 49346000      | 69009000      |
| <i>SERPINC1</i>    | 45.66  | 93763000      | 38134000      | 46887000      |
| <i>NCL</i>         | 43.1   | 24207000      | 33149000      | 12983000      |
| <i>E2F1</i>        | 41.975 | 0             | 11128000      | 1713100       |
| <i>HBA1</i>        | 38.953 | 79566000      | 22367000      | 30802000      |
| <i>CFB</i>         | 38.904 | 0             | 335970000     | 610130000     |
| <i>CP</i>          | 38.275 | 6540100       | 45273000      | 30197000      |
| <i>IGHM</i>        | 35.366 | 17291000      | 546710000     | 529550000     |
| <i>DCD</i>         | 31.359 | 103500000     | 41712000      | 23633000      |
| <i>SFPQ</i>        | 30.333 | 32792000      | 42575000      | 12013000      |
| <i>HPX</i>         | 29.586 | 5883000       | 141360000     | 418550000     |
| <i>SERPINA3</i>    | 29.416 | 0             | 27603000      | 297020000     |
| <i>KNG1</i>        | 28.138 | 401760000     | 6245700       | 14940000      |
| <i>ITIH4</i>       | 26.585 | 0             | 161690000     | 222090000     |
| <i>SERPIND1</i>    | 25.807 | 0             | 22125000      | 96624000      |
| <i>F2</i>          | 25.492 | 3072800       | 52704000      | 39287000      |
| <i>PGLYRP2</i>     | 23.916 | 0             | 37199000      | 32817000      |
| <i>PROS1</i>       | 22.61  | 0             | 20412000      | 46547000      |
| <i>HNRNPD</i>      | 21.974 | 11474000      | 15865000      | 9158400       |
| <i>APOB</i>        | 21.144 | 0             | 73796000      | 67252000      |
